# Supplementary material for: Time series analysis of neoadjuvant chemotherapy and bevacizumab-treated breast carcinomas reveals a systemic shift in genomic aberrations
Source: Genome Med. 2018 Nov 29;10:92. doi: 10.1186/s13073-018-0601-y (PMC6262977; doi:10.1186/s13073-018-0601-y)
Supplement: Supplementary file 5 — Table S4. Aberrant genes in > 30% of the samples at week 25 within the Combination arm. (XLSX 25 kb) [file 13073_2018_601_MOESM5_ESM.xlsx]

## Sheet: Table S4
Table S4: Genes where >30% of tumors had gain or deletion at week 25 in Combination-arm
Gene	Chromosome and cytoband	Samples with gain (%)	Samples with deletion (%)
DST	6p12.1	0	37.5
BEND6	6p12.1	0	37.5
KIAA1586	6p12.1	0	37.5
ZNF451	6p12.1	0	37.5
RAB23	6p11.2	0	37.5
GUSBP1	6p11.2	0	37.5
SCML4	6q21	0	37.5
SEC63	6q21	0	37.5
OSTM1	6q21	0	37.5
OSTM1-AS1	6q21	0	37.5
NR2E1	6q21	0	37.5
SNX3	6q21	0	37.5
LACE1	6q21	0	37.5
FOXO3	6q21	0	37.5
LINC00222	6q21	0	37.5
ARMC2	6q21	0	37.5
SESN1	6q21	0	37.5
CEP57L1	6q21	0	37.5
LOC100996634	6q21	0	37.5
CCDC162P	6q21	0	37.5
CD164	6q21	0	37.5
PPIL6	6q21	0	37.5
MICAL1	6q21	0	37.5
AK9	6q21	0	37.5
LOC100287632	6q22.31	0	37.5
ASF1A	6q22.31	0	37.5
MCM9	6q22.31	0	37.5
FAM184A	6q22.31	0	37.5
MAN1A1	6q22.31	0	37.5
C6orf170	6q22.31	0	37.5
GJA1	6q22.31	0	37.5
HSF2	6q22.31	0	37.5
SERINC1	6q22.31	0	37.5
PKIB	6q22.31	0	37.5
FABP7	6q22.31	0	37.5
SMPDL3A	6q22.31	0	37.5
CLVS2	6q22.31	0	37.5
TRDN	6q22.31	0	37.5
HIVEP2	6q24.2	0	37.5
LOC100507489	6q24.2	0	37.5
AIG1	6q24.2	0	37.5
PEX3	6q24.2	0	37.5
FUCA2	6q24.2	0	37.5
PHACTR2	6q24.2	0	37.5
LTV1	6q24.2	0	37.5
ZC2HC1B	6q24.2	0	37.5
PLAGL1	6q24.2	0	37.5
SF3B5	6q24.2	0	37.5
STX11	6q24.2	0	37.5
LOC100507403	8p11.23	37.5	12.5
LOC100507439	8p11.23	37.5	12.5
LOC157860	8p11.23	37.5	12.5
ZNF703	8p11.23	37.5	12.5
ERLIN2	8p11.23	37.5	12.5
GPR124	8p11.23	37.5	12.5
RAB11FIP1	8p11.23	37.5	12.5
GOT1L1	8p11.23	37.5	12.5
EIF4EBP1	8p11.23	37.5	12.5
ASH2L	8p11.23	37.5	12.5
STAR	8p11.23	37.5	12.5
LSM1	8p11.23	37.5	12.5
BAG4	8p11.23	37.5	12.5
DDHD2	8p11.23	37.5	12.5
WHSC1L1	8p11.23	37.5	12.5
LETM2	8p11.23	37.5	12.5
FGFR1	8p11.22	37.5	12.5
C8orf86	8p11.22	37.5	12.5
TACC1	8p11.22	37.5	12.5
PLEKHA2	8p11.22	37.5	12.5
HTRA4	8p11.22	37.5	12.5
ADAM9	8p11.22	37.5	12.5
ADAM32	8p11.22	37.5	12.5
ADAM5	8p11.22	25	37.5
ADAM3A	8p11.22	25	37.5
LOC100130964	8p11.22	25	37.5
ADAM18	8p11.22	37.5	12.5
ADAM2	8p11.22	37.5	12.5
IDO1	8p11.21	37.5	12.5
ACP2	8p11.21	37.5	12.5
IDO2	8p11.21	37.5	12.5
C8orf4	8p11.21	37.5	12.5
LOC100507481	8p11.21	37.5	0
ZMAT4	8p11.21	37.5	0
SFRP1	8p11.21	37.5	0
GOLGA7	8p11.21	37.5	0
GINS4	8p11.21	37.5	0
AGPAT6	8p11.21	37.5	0
NKX6-3	8p11.21	37.5	0
ANK1	8p11.21	37.5	0
DPY19L4	8q22.1	37.5	0
INTS8	8q22.1	37.5	0
CCNE2	8q22.1	37.5	0
TP53INP1	8q22.1	37.5	0
NDUFAF6	8q22.1	37.5	0
PLEKHF2	8q22.1	37.5	0
UQCRB	8q22.1	37.5	0
MTERFD1	8q22.1	37.5	0
PTDSS1	8q22.1	37.5	0
SDC2	8q22.1	37.5	0
CPQ	8q22.1	37.5	0
TSPYL5	8q22.1	37.5	0
MTDH	8q22.1	37.5	0
LAPTM4B	8q22.1	37.5	0
MATN2	8q22.1	37.5	0
FLJ42969	8q22.3	37.5	0
ZNF706	8q22.3	37.5	0
LOC100506652	8q22.3	37.5	0
NACAP1	8q22.3	37.5	0
NCALD	8q22.3	37.5	0
RRM2B	8q22.3	37.5	0
UBR5	8q22.3	37.5	0
ODF1	8q22.3	37.5	0
ZFPM2	8q23.1	37.5	0
OXR1	8q23.1	37.5	0
RSPO2	8q23.1	37.5	0
EIF3E	8q23.1	37.5	0
EMC2	8q23.1	37.5	0
TMEM74	8q23.1	37.5	0
TRHR	8q23.1	37.5	0
NUDCD1	8q23.1	37.5	0
ENY2	8q23.1	37.5	0
PKHD1L1	8q23.1	37.5	0
EBAG9	8q23.2	37.5	0
SYBU	8q23.2	37.5	0
CSMD3	8q23.3	37.5	0
TRPS1	8q23.3	37.5	0
LINC00536	8q23.3	37.5	0
EIF3H	8q23.3	37.5	0
UTP23	8q24.11	37.5	0
RAD21	8q24.11	37.5	0
AARD	8q24.11	37.5	0
SLC30A8	8q24.11	37.5	0
MED30	8q24.11	37.5	0
EXT1	8q24.11	37.5	0
SAMD12	8q24.12	37.5	0
TNFRSF11B	8q24.12	37.5	0
COLEC10	8q24.12	37.5	0
MAL2	8q24.12	37.5	0
NOV	8q24.12	37.5	0
ENPP2	8q24.12	37.5	0
TAF2	8q24.12	37.5	0
DSCC1	8q24.12	37.5	0
DEPTOR	8q24.12	37.5	0
COL14A1	8q24.12	37.5	0
MRPL13	8q24.12	37.5	0
MTBP	8q24.12	37.5	0
SNTB1	8q24.12	37.5	0
ZHX2	8q24.13	37.5	0
DERL1	8q24.13	37.5	0
WDR67	8q24.13	37.5	0
FAM83A	8q24.13	37.5	0
C8orf76	8q24.13	37.5	0
ZHX1-C8ORF76	8q24.13	37.5	0
ZHX1	8q24.13	37.5	0
ATAD2	8q24.13	37.5	0
WDYHV1	8q24.13	37.5	0
FBXO32	8q24.13	37.5	0
KLHL38	8q24.13	37.5	0
ANXA13	8q24.13	37.5	0
FAM91A1	8q24.13	37.5	0
FER1L6	8q24.13	37.5	0
TMEM65	8q24.13	37.5	0
LOC100507018	8q24.13	37.5	0
RNF139	8q24.13	37.5	0
TATDN1	8q24.13	37.5	0
NDUFB9	8q24.13	37.5	0
MTSS1	8q24.13	37.5	0
LINC00964	8q24.13	37.5	0
ZNF572	8q24.13	37.5	0
SQLE	8q24.13	37.5	0
KIAA0196	8q24.13	37.5	0
NSMCE2	8q24.13	37.5	0
TRIB1	8q24.13	37.5	0
LINC00861	8q24.13	37.5	0
FAM84B	8q24.21	37.5	0
PCAT1	8q24.21	37.5	0
CCAT1	8q24.21	37.5	0
LOC727677	8q24.21	37.5	0
POU5F1B	8q24.21	37.5	0
MYC	8q24.21	37.5	0
PVT1	8q24.21	37.5	0
MIR1208	8q24.21	37.5	0
LOC728724	8q24.21	37.5	0
CCDC26	8q24.21	37.5	0
GSDMC	8q24.21	37.5	0
FAM49B	8q24.21	37.5	0
ASAP1	8q24.21	37.5	0
EFR3A	8q24.22	37.5	0
OC90	8q24.22	37.5	0
HHLA1	8q24.22	37.5	0
FAM135B	8q24.23	37.5	0
COL22A1	8q24.3	37.5	0
KCNK9	8q24.3	50	0
TRAPPC9	8q24.3	37.5	0
AGO2	8q24.3	37.5	0
PTK2	8q24.3	37.5	0
DENND3	8q24.3	37.5	0
SLC45A4	8q24.3	37.5	0
LOC731779	8q24.3	37.5	0
GPR20	8q24.3	37.5	0
LOC401480	8q24.3	37.5	0
PTP4A3	8q24.3	37.5	0
MROH5	8q24.3	37.5	0
LINC00051	8q24.3	37.5	0
TSNARE1	8q24.3	37.5	0
LOC286121	8q24.3	37.5	0
BAI1	8q24.3	37.5	0
ARC	8q24.3	37.5	0
JRK	8q24.3	37.5	0
PSCA	8q24.3	37.5	0
LY6K	8q24.3	37.5	0
LOC100288181	8q24.3	37.5	0
THEM6	8q24.3	37.5	0
SLURP1	8q24.3	37.5	0
LYPD2	8q24.3	37.5	0
LYNX1	8q24.3	37.5	0
GML	8q24.3	37.5	0
CYP11B1	8q24.3	37.5	0
CYP11B2	8q24.3	37.5	0
LOC100133669	8q24.3	37.5	0
LY6H	8q24.3	37.5	0
GPIHBP1	8q24.3	37.5	0
ZFP41	8q24.3	37.5	0
GLI4	8q24.3	37.5	0
LOC100507316	8q24.3	37.5	0
ZNF696	8q24.3	37.5	0
TOP1MT	8q24.3	37.5	0
RHPN1	8q24.3	37.5	0
MAFA	8q24.3	37.5	0
ZC3H3	8q24.3	37.5	0
GSDMD	8q24.3	37.5	0
PC	11q13.2	37.5	0
C11orf86	11q13.2	37.5	0
SYT12	11q13.2	37.5	0
RHOD	11q13.2	37.5	0
KDM2A	11q13.2	37.5	0
ADRBK1	11q13.2	37.5	0
SSH3	11q13.2	37.5	0
CLCF1	11q13.2	37.5	0
RAD9A	11q13.2	37.5	0
PPP1CA	11q13.2	37.5	0
RPS6KB2	11q13.2	37.5	0
GPR152	11q13.2	37.5	0
CABP4	11q13.2	37.5	0
AIP	11q13.2	37.5	0
CDK2AP2	11q13.2	37.5	0
CABP2	11q13.2	37.5	0
GSTP1	11q13.2	37.5	0
C11orf72	11q13.2	37.5	0
NDUFV1	11q13.2	37.5	0
MYEOV	11q13.3	37.5	0
LOC100505834	11q13.3	37.5	0
CCND1	11q13.3	37.5	0
ORAOV1	11q13.3	37.5	0
FGF19	11q13.3	37.5	0
FGF3	11q13.3	37.5	0
LOC100127946	11q13.3	37.5	0
ANO1-AS2	11q13.3	37.5	0
ANO1	11q13.3	37.5	0
FADD	11q13.3	37.5	0
PPFIA1	11q13.3	37.5	0
CTTN	11q13.3	37.5	0
DHCR7	11q13.4	0	37.5
NADSYN1	11q13.4	0	37.5
KRTAP5-7	11q13.4	0	37.5
KRTAP5-8	11q13.4	0	37.5
KRTAP5-9	11q13.4	0	37.5
KRTAP5-10	11q13.4	0	37.5
MRPL48	11q13.4	0	37.5
COA4	11q13.4	0	37.5
PAAF1	11q13.4	0	37.5
DNAJB13	11q13.4	0	37.5
UCP2	11q13.4	0	37.5
UCP3	11q13.4	0	37.5
C2CD3	11q13.4	0	37.5
PPME1	11q13.4	0	37.5
P4HA3	11q13.4	0	37.5
PGM2L1	11q13.4	0	37.5
KCNE3	11q13.4	0	37.5
LOC100287896	11q13.4	0	37.5
POLD3	11q13.4	0	37.5
RNF169	11q13.4	0	37.5
TENM4	11q14.1	0	37.5
FAM181B	11q14.1	0	37.5
PRCP	11q14.1	0	37.5
C11orf82	11q14.1	0	37.5
RAB30	11q14.1	0	37.5
RAB30-AS1	11q14.1	0	37.5
PCF11	11q14.1	0	37.5
LOC100506282	11q14.1	0	37.5
ANKRD42	11q14.1	0	37.5
CCDC90B	11q14.1	0	37.5
SYTL2	11q14.1	0	37.5
CCDC83	11q14.2	0	37.5
PICALM	11q14.2	0	37.5
EED	11q14.2	0	37.5
C11orf73	11q14.2	0	37.5
CCDC81	11q14.2	0	37.5
ME3	11q14.2	0	37.5
PRSS23	11q14.2	0	37.5
LOC100506368	11q14.2	0	37.5
TMEM135	11q14.2	0	37.5
RAB38	11q14.2	0	37.5
CTSC	11q14.2	0	37.5
GRM5	11q14.3	0	37.5
SRSF8	11q21	0	37.5
ENDOD1	11q21	0	37.5
LOC100129203	11q21	0	37.5
SESN3	11q21	0	37.5
FAM76B	11q21	0	37.5
CEP57	11q21	0	37.5
MTMR2	11q21	0	37.5
MAML2	11q21	0	37.5
CCDC82	11q21	0	37.5
JRKL	11q21	0	37.5
JRKL-AS1	11q21	0	37.5
CNTN5	11q22.1	0	37.5
LOC100128386	11q22.1	0	37.5
ARHGAP42	11q22.1	0	37.5
TMEM133	11q22.1	0	37.5
PGR	11q22.1	0	37.5
TRPC6	11q22.1	0	37.5
ANGPTL5	11q22.1	0	37.5
KIAA1377	11q22.1	0	37.5
C11orf70	11q22.1	0	37.5
BIRC3	11q22.2	0	37.5
BIRC2	11q22.2	0	37.5
TMEM123	11q22.2	0	37.5
MMP7	11q22.2	0	37.5
MMP20	11q22.2	0	37.5
MMP27	11q22.2	0	37.5
MMP8	11q22.2	0	37.5
WTAPP1	11q22.2	0	37.5
MMP10	11q22.2	0	37.5
MMP1	11q22.2	0	37.5
MMP3	11q22.2	0	37.5
MMP12	11q22.2	0	37.5
MMP13	11q22.2	0	37.5
DCUN1D5	11q22.3	0	37.5
DYNC2H1	11q22.3	0	37.5
PDGFD	11q22.3	0	37.5
CASP12	11q22.3	0	37.5
LOC643733	11q22.3	0	37.5
CASP4	11q22.3	0	37.5
CASP5	11q22.3	0	37.5
CARD16	11q22.3	0	37.5
CARD17	11q22.3	0	37.5
CARD18	11q22.3	0	37.5
GRIA4	11q22.3	0	37.5
MSANTD4	11q22.3	0	37.5
KBTBD3	11q22.3	0	37.5
AASDHPPT	11q22.3	0	37.5
GUCY1A2	11q22.3	0	37.5
CWF19L2	11q22.3	0	37.5
ALKBH8	11q22.3	0	37.5
ELMOD1	11q22.3	0	37.5
SLN	11q22.3	0	37.5
SLC35F2	11q22.3	0	37.5
RAB39A	11q22.3	0	37.5
CUL5	11q22.3	0	37.5
ACAT1	11q22.3	0	37.5
NPAT	11q22.3	0	37.5
ATM	11q22.3	0	37.5
C11orf65	11q22.3	0	37.5
KDELC2	11q22.3	0	37.5
EXPH5	11q22.3	0	37.5
DDX10	11q22.3	0	37.5
SKCG-1	11q22.3	0	37.5
C11orf87	11q22.3	0	37.5
ZC3H12C	11q22.3	0	37.5
RDX	11q22.3	0	37.5
FDX1	11q22.3	0	37.5
C11orf53	11q23.1	0	37.5
C11orf93	11q23.1	0	37.5
POU2AF1	11q23.1	0	37.5
BTG4	11q23.1	0	37.5
C11orf88	11q23.1	0	37.5
LAYN	11q23.1	0	37.5
SIK2	11q23.1	0	37.5
PPP2R1B	11q23.1	0	37.5
ALG9	11q23.1	0	37.5
FDXACB1	11q23.1	0	37.5
C11orf1	11q23.1	0	37.5
CRYAB	11q23.1	0	37.5
HSPB2	11q23.1	0	37.5
C11orf52	11q23.1	0	37.5
DIXDC1	11q23.1	0	37.5
DLAT	11q23.1	0	37.5
C11orf57	11q23.1	0	37.5
TIMM8B	11q23.1	0	37.5
IL18	11q23.1	0	37.5
TEX12	11q23.1	0	37.5
BCO2	11q23.1	0	37.5
C11orf34	11q23.1	0	37.5
PTS	11q23.1	0	37.5
LOC283140	11q23.1	0	37.5
LOC387810	11q23.1	0	37.5
NCAM1	11q23.2	0	37.5
TTC12	11q23.2	0	37.5
ANKK1	11q23.2	0	37.5
DRD2	11q23.2	0	37.5
TMPRSS5	11q23.2	0	37.5
ZW10	11q23.2	0	37.5
USP28	11q23.2	0	37.5
HTR3B	11q23.2	0	37.5
HTR3A	11q23.2	0	37.5
ZBTB16	11q23.2	0	37.5
NNMT	11q23.2	0	37.5
C11orf71	11q23.2	0	37.5
RBM7	11q23.2	0	37.5
REXO2	11q23.2	0	37.5
NXPE1	11q23.2	0	37.5
NXPE4	11q23.3	0	37.5
NXPE2	11q23.3	0	37.5
CADM1	11q23.3	0	37.5
LINC00900	11q23.3	0	37.5
BUD13	11q23.3	0	37.5
ZNF259	11q23.3	0	37.5
APOA5	11q23.3	0	37.5
APOA4	11q23.3	0	37.5
APOC3	11q23.3	0	37.5
APOA1	11q23.3	0	37.5
SIK3	11q23.3	0	37.5
PAFAH1B2	11q23.3	0	37.5
SIDT2	11q23.3	0	37.5
PCSK7	11q23.3	0	37.5
RNF214	11q23.3	0	37.5
BACE1	11q23.3	0	37.5
CEP164	11q23.3	0	37.5
DSCAML1	11q23.3	0	37.5
FXYD2	11q23.3	0	37.5
FXYD6-FXYD2	11q23.3	0	37.5
FXYD6	11q23.3	0	37.5
TMPRSS13	11q23.3	0	37.5
IL10RA	11q23.3	0	37.5
TMPRSS4	11q23.3	0	37.5
SCN4B	11q23.3	0	37.5
SCN2B	11q23.3	0	37.5
AMICA1	11q23.3	0	37.5
MPZL3	11q23.3	0	37.5
MPZL2	11q23.3	0	37.5
CD3E	11q23.3	0	37.5
CD3D	11q23.3	0	37.5
UBE4A	11q23.3	0	37.5
ATP5L	11q23.3	0	37.5
KMT2A	11q23.3	0	37.5
TMEM25	11q23.3	0	37.5
IFT46	11q23.3	0	37.5
ARCN1	11q23.3	0	37.5
PHLDB1	11q23.3	0	37.5
DDX6	11q23.3	0	37.5
CXCR5	11q23.3	0	37.5
BCL9L	11q23.3	0	37.5
UPK2	11q23.3	0	37.5
FOXR1	11q23.3	0	37.5
CCDC84	11q23.3	0	37.5
RPS25	11q23.3	0	37.5
TRAPPC4	11q23.3	0	37.5
SLC37A4	11q23.3	0	37.5
HYOU1	11q23.3	0	37.5
VPS11	11q23.3	0	37.5
HMBS	11q23.3	0	37.5
DPAGT1	11q23.3	0	37.5
C2CD2L	11q23.3	0	37.5
HINFP	11q23.3	0	37.5
ABCG4	11q23.3	0	37.5
NLRX1	11q23.3	0	37.5
CBL	11q23.3	0	37.5
RNF26	11q23.3	0	37.5
MFRP	11q23.3	0	37.5
USP2	11q23.3	0	37.5
USP2-AS1	11q23.3	0	37.5
THY1	11q23.3	0	37.5
PVRL1	11q23.3	0	37.5
TRIM29	11q23.3	0	37.5
OAF	11q23.3	0	37.5
POU2F3	11q23.3	0	37.5
TMEM136	11q23.3	0	37.5
ARHGEF12	11q23.3	0	37.5
GRIK4	11q23.3	0	37.5
TBCEL	11q23.3	0	37.5
TECTA	11q23.3	0	37.5
SC5D	11q23.3	0	37.5
SORL1	11q24.1	0	37.5
MIR100HG	11q24.1	0	37.5
MIRLET7A2	11q24.1	0	37.5
UBASH3B	11q24.1	0	37.5
CRTAM	11q24.1	0	37.5
C11orf63	11q24.1	0	37.5
BSX	11q24.1	0	37.5
LOC341056	11q24.1	0	37.5
HSPA8	11q24.1	0	37.5
CLMP	11q24.1	0	37.5
LOC100128242	11q24.1	0	37.5
GRAMD1B	11q24.1	0	37.5
SCN3B	11q24.1	0	37.5
ZNF202	11q24.1	0	37.5
OR6X1	11q24.1	0	37.5
OR6M1	11q24.1	0	37.5
OR8D4	11q24.1	0	37.5
OR4D5	11q24.1	0	37.5
OR6T1	11q24.1	0	37.5
OR10G4	11q24.1	0	37.5
OR10G7	11q24.2	0	37.5
VWA5A	11q24.2	0	37.5
OR10D1P	11q24.2	0	37.5
OR10D3	11q24.2	0	37.5
OR8G2	11q24.2	0	37.5
OR8G1	11q24.2	0	37.5
OR8D1	11q24.2	0	37.5
OR8D2	11q24.2	0	37.5
OR8B2	11q24.2	0	37.5
OR8B3	11q24.2	0	37.5
OR8B4	11q24.2	0	37.5
OR8B8	11q24.2	0	37.5
OR8A1	11q24.2	0	37.5
PANX3	11q24.2	0	37.5
TBRG1	11q24.2	0	37.5
SIAE	11q24.2	0	37.5
SPA17	11q24.2	0	37.5
NRGN	11q24.2	0	37.5
VSIG2	11q24.2	0	37.5
ESAM	11q24.2	0	37.5
MSANTD2	11q24.2	0	37.5
LOC100507283	11q24.2	0	37.5
ROBO3	11q24.2	0	37.5
ROBO4	11q24.2	0	37.5
HEPACAM	11q24.2	0	37.5
CCDC15	11q24.2	0	37.5
SLC37A2	11q24.2	0	37.5
TMEM218	11q24.2	0	37.5
PKNOX2	11q24.2	0	37.5
FEZ1	11q24.2	0	37.5
EI24	11q24.2	0	37.5
STT3A	11q24.2	0	37.5
CHEK1	11q24.2	0	37.5
ACRV1	11q24.2	0	37.5
PATE1	11q24.2	0	37.5
PATE2	11q24.2	0	37.5
PATE3	11q24.2	0	37.5
PATE4	11q24.2	0	37.5
HYLS1	11q24.2	0	37.5
PUS3	11q24.2	0	37.5
DDX25	11q24.2	0	37.5
LOC338667	11q24.2	0	37.5
CDON	11q24.2	0	37.5
RPUSD4	11q24.2	0	37.5
FAM118B	11q24.2	0	37.5
SRPR	11q24.2	0	37.5
FOXRED1	11q24.2	0	37.5
TIRAP	11q24.2	0	37.5
DCPS	11q24.2	0	37.5
ST3GAL4	11q24.2	0	37.5
KIRREL3	11q24.2	0	37.5
KIRREL3-AS3	11q24.2	0	37.5
ETS1	11q24.3	0	37.5
FLI1	11q24.3	0	37.5
KCNJ1	11q24.3	0	37.5
C11orf45	11q24.3	0	37.5
KCNJ5	11q24.3	0	37.5
TP53AIP1	11q24.3	0	37.5
ARHGAP32	11q24.3	0	37.5
BARX2	11q24.3	0	37.5
TMEM45B	11q24.3	0	37.5
NFRKB	11q24.3	0	37.5
PRDM10	11q24.3	0	37.5
APLP2	11q24.3	0	37.5
ST14	11q24.3	0	37.5
ADAMTS8	11q24.3	0	37.5
ADAMTS15	11q24.3	0	37.5
C11orf44	11q24.3	0	37.5
LOC100507431	11q24.3	0	37.5
SNX19	11q24.3	0	37.5
NTM	11q25	0	37.5
OPCML	11q25	0	37.5
LOC646522	11q25	0	37.5
SPATA19	11q25	0	37.5
LOC646543	11q25	0	37.5
IGSF9B	11q25	0	37.5
LOC100128239	11q25	0	37.5
JAM3	11q25	0	37.5
NCAPD3	11q25	0	37.5
VPS26B	11q25	0	37.5
THYN1	11q25	0	37.5
ACAD8	11q25	0	37.5
GLB1L3	11q25	0	37.5
GLB1L2	11q25	0	37.5
B3GAT1	11q25	0	37.5
LOC283177	11q25	0	37.5
LOC729305	11q25	0	37.5
LOC100507548	11q25	0	37.5
LOC284898	22q12.1	37.5	0
FLJ44385	22q13.33	0	37.5
C22orf34	22q13.33	0	37.5
BRD1	22q13.33	0	37.5
ZBED4	22q13.33	0	37.5
ALG12	22q13.33	0	37.5
CRELD2	22q13.33	0	37.5
IL17REL	22q13.33	12.5	37.5
MLC1	22q13.33	12.5	37.5
MOV10L1	22q13.33	12.5	37.5
PANX2	22q13.33	12.5	37.5
TRABD	22q13.33	12.5	37.5
SELO	22q13.33	12.5	37.5
TUBGCP6	22q13.33	12.5	37.5
HDAC10	22q13.33	12.5	37.5
MAPK11	22q13.33	12.5	37.5
PPP6R2	22q13.33	12.5	37.5
SBF1	22q13.33	12.5	37.5
ADM2	22q13.33	12.5	37.5
NCAPH2	22q13.33	12.5	37.5
TYMP	22q13.33	12.5	37.5
SYCE3	22q13.33	12.5	37.5
CPT1B	22q13.33	12.5	37.5
CHKB	22q13.33	12.5	37.5
ARSA	22q13.33	12.5	37.5
SHANK3	22q13.33	12.5	37.5
LOC100506917	22q13.33	12.5	37.5
ACR	22q13.33	12.5	37.5
RABL2B	22q13.33	12.5	37.5
